# Supplementary material for: The ribonuclease Dis3 is an essential regulator of the developmental transcriptome
Source: PubMed Central journal article supplement (PMC3434026; doi:10.1186/1471-2164-13-359), 2012-08-01

(a)

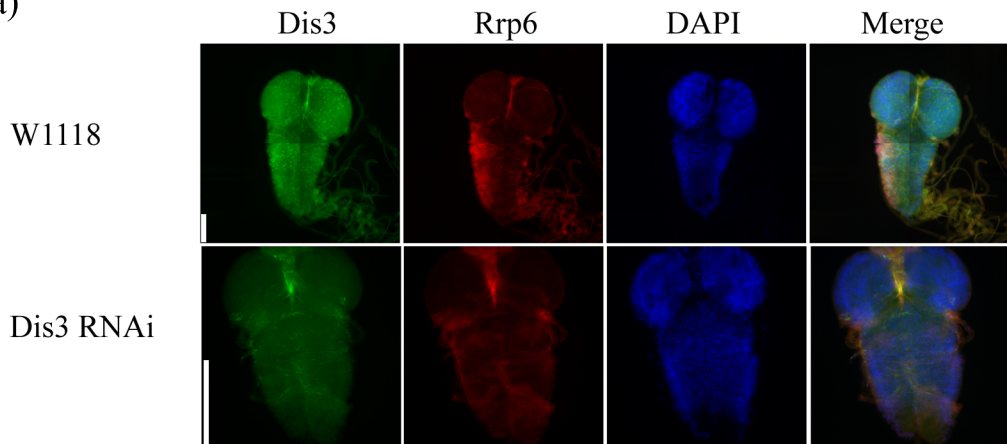

(b)

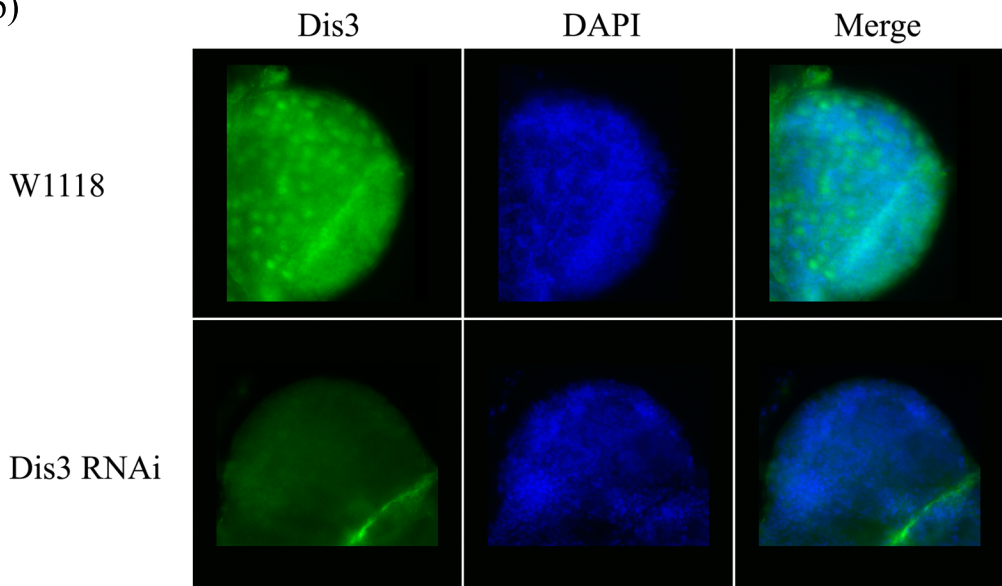

Supplement: 1471-2164-13-359-S1.pdf [file 1471-2164-13-359-S1.pdf]
